# Supplementary material for: Advanced Voltametric Characterization of Polyphenols in Wine Using a Modified Carbon Paste Electrode with TiO<sub>2</sub> Nanoparticles
Source: Preprints.org preprint supplement (doi:10.20944/preprints202404.1059.v1), 2024-04-16
Supplement: Supplementary file 1 [file supplementary]

**Advanced voltametric characterization of polyphenols in wine using a modified carbon paste electrode with TiO2 nanoparticles**

| 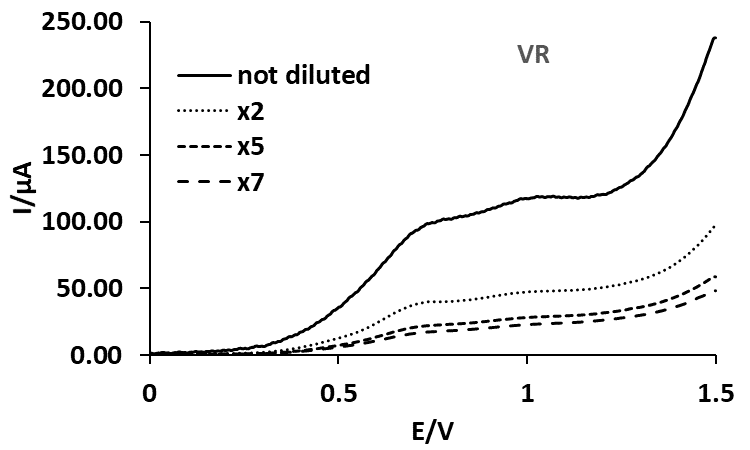 | 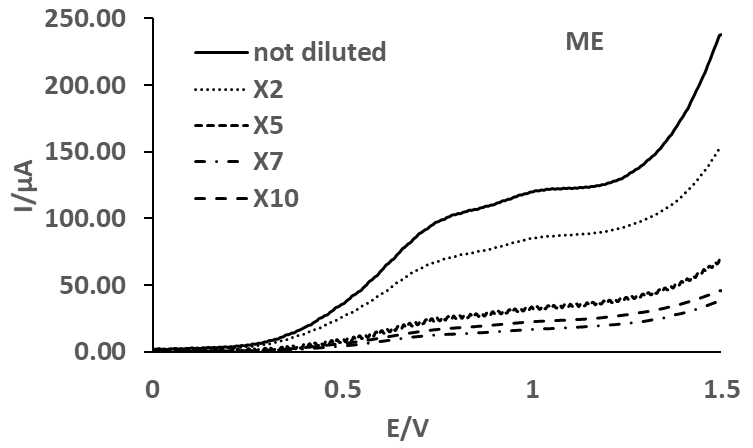 |
| --- | --- |
| (a) | (b) |
| 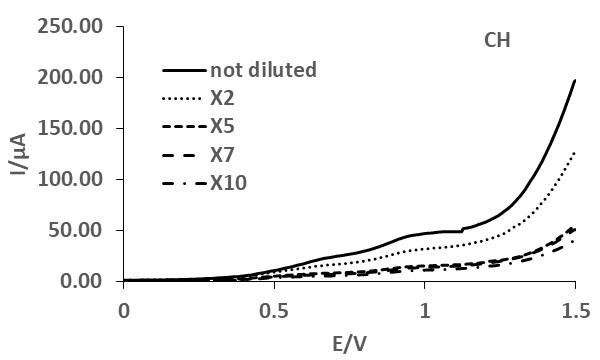 | 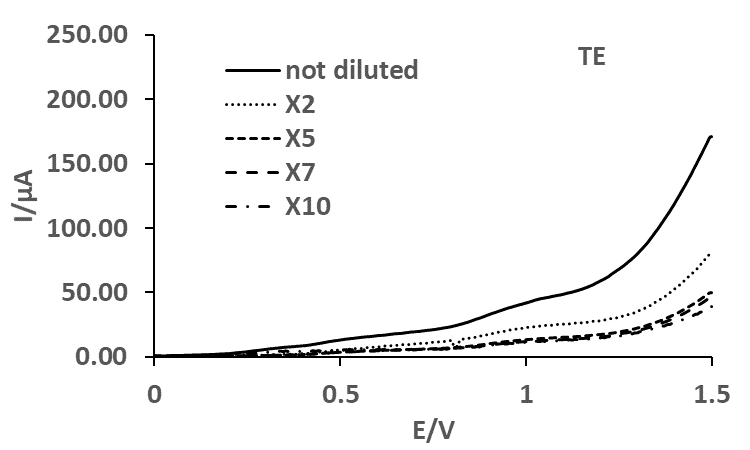 |
| (c) | (d) |
| 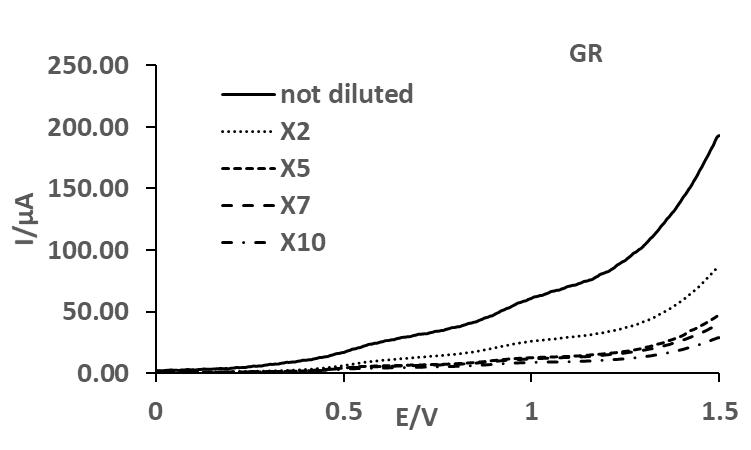 | 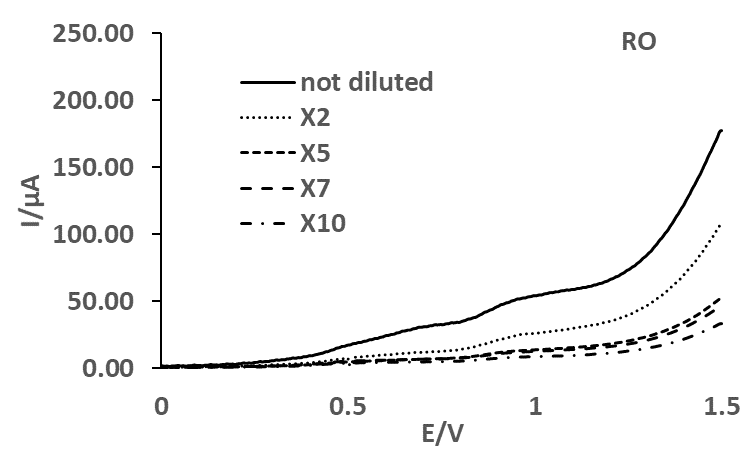 |
| (e) | (f) |

**Figure S1.** Anodic branch of the cyclic voltammograms recorded in undiluted and diluted (x2, x5, x7, x10) real wine samples: (a) VR; (b) ME; (c) CH; (d) TE; (e) GR and (f) RO on MCPE/np TiO2 electrode.

**Table S1.** pKa constants for GA, RE, QV, CT and CA.

| **Poliphenol** | **pKa1** | **pKa2** | **pKa3** | **pKa4** | **pKa5** |
| --- | --- | --- | --- | --- | --- |
| **GA** | 4.26 | 8.69 | 11.45 |  |  |
| **RE** | 9.16 | 9.77 | 10.55 |  |  |
| **QV** | 7.17 | 8.26 | 10.13 |  |  |
| **CT** | 9.50 | 8.90 | 8.20-8.60 | 10.30-11.02 | 13.20-14.80 |
| **CA** | 4.80 | 8.60 |  |  |  |
